# Supplementary material for: ADAM10 modulates SOX9 expressionviaN1ICD during chondrogenesis at the cranial base
Source: Royal Society of Chemistry journal article supplement (doi:10.1039/c8ra05609a), 2018-01-01
Supplement: c8ra05609a1.pdf [file c8ra05609a1.pdf]

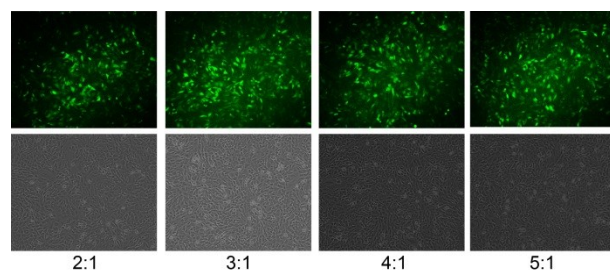

*Supplementary Fig.: The optimal transfection reagent:plasmid ratio for the ATDC5 cell line. ATDC5 cells in a 12-well plate were transfected with GFP plasmids at reagent:plasmid ratios of 2:1, 3:1, 4:1 and 5:1. The green fluorescence represents GFP expressed by cells transfected with plasmids.*
